# Supplementary material for: Synthesis of planar chiral tricarbonylcyclopentadienylmanganese complexes using a Mn(CO)3+ transfer reaction
Source: Royal Society of Chemistry journal article supplement (doi:10.1039/b102693n), 2001-01-01
Supplement: b102693n.doc [file b102693n.doc]

*Supporting Information for*

Synthesis of Planar Chiral Ttricarbonylcyclopentadienylmanganese Complexes

Using a Mn(CO)3**+** Transfer Reaction

Seung Uk Son, Kang Hyun Park, Seung Jung Lee and Young Keun Chung*,

School of Chemistry and Center for Molecular Catalysis,

Seoul National University, Seoul 151-747, Korea

Dwight A. Sweigart*

Department of Chemistry, Brown University, Providence, RI 02912, U. S. A.

Characterization and Yields of New Compounds

**Compound 2b**: Yield: 51%; IR (CO) 2016, 1940 cm**-**1; 1H NMR (300 MHz, d6-benzene, TMS)  4.97 (br s, 1 H), 4.78 (br s, 1 H), 4.20 (br s, 1 H), 3.98 (br s, 1 H), 3.66 (dd, 3.7, 11.0 Hz, 1 H), 3.48 (m, 1 H), 3.24 (m, 2 H), 3.04 (m, 1 H), 3.01 (s, 3 H), 1.48 (m, 1 H), 0.85 (d, 13.0 Hz, 1 H) ppm; 13C NMR (75 MHz, d6-benzene)  = 225.7, 111.7, 97.2, 91.5, 86.0, 83.9, 82.5, 76.3, 75.2, 66.2, 58.8, 27.8, 0.35 ppm; HRMS: calcd for C17H22MnO6Si: 407.0723, obs. 407.0724; = –2.1 (c 0.39 in CH2Cl2).

**Compound 2c**: Yield: 51%; IR (CO) 2020, 1938 cm**-**1; 1H NMR (300 MHz, d6-benzene, TMS)  6.32 (dd, 15.0, 20.0 Hz, 1 H), 5.97 (d, 15.0 Hz, 1 H), 5.75 (d, 20.0 Hz, 1 H), 5.05 (s, 1 H), 4.86 (br s, 1 H), 4.30 (br s, 1 H), 3.70 (dd, 3.7, 11.0 Hz, 1 H), 3.50 (m, 1 H), 3.29 (m, 2 H), 3.11 (m, 1 H), 3.08 (s, 3 H), 1.56 (m, 1 H), 0.90 (d, 13.0 Hz, 1 H), 0.36 (s, 3 H), 0.35 (s, 3 H) ppm; 13C NMR (75 MHz, d6-benzene)  225.5, 138.4, 132.6, 111.9, 97.0, 91.9, 84.3, 83.9, 82.6, 76.2, 75.2, 66.2, 58.8, 27.9, -1.28, -1.49 ppm; HRMS: calcd for C18H22MnO6Si: 419.0723, obs. 419.0723; = –3.0 (c 0.59 in CH2Cl2).

**Synthesis of 4**: Compound **2a** (0.17 g, 0.49 mmol) and diethyl ether (15 mL) were put in a flame-dried schlenk flask. The solution was cooled to –78 C and *t*-BuLi (0.34 mL, 1.7 M in hexane) was added. After the resulting solution was stirred at –78 C for 3 h, PPh2Cl (0.13 mL, 0.72 mmol) was added at –78C. The solution was stirred at –78 C for 2 h and at rt for 2 h. Excess diethyl ether and sat. NH4Cl were added to extract the product. The ether solution was dried over anhydrous MgSO4 and chromatographed on a silica gel column eluting with hexane and diethyl ether (v/v. 20:1). Yield: 67%; IR (CO) 2018, 1936 cm**-**1; 1H NMR (300 MHz, d6-benzene, TMS)  7.43-7.38 (m, 10 H), 5.49 (d, 3.2 Hz, 1 H), 4.33 (d, 2.5 Hz, 1 H), 4.16 (dd, 4.7, 11.0 Hz, 1 H), 4.15 (d, 2.5 Hz, 1 H), 3.82-3.66 (m, 2 H), 3.19 (s, 3 H), 3.10 (m, 2 H), 2.13 (s, 3 H), 1.60 (m, 1 H), 1.35 (d, 13.0 Hz, 1 H) ppm; elemental analysis (%): calcd: C 60.91, H 4.92; found: C 60.73, H 5.03; = -229 (c 0.12, CH2Cl2).

**Synthesis of 6**: Compound **5** (0.50 g, 1.12 mmol), [(6-C10H8)Mn(CO)3]BF4(0.47 g, 1.32 mmol), molecular sieves 4 Å (0.50 g), and 15 mL of CH2Cl2 were put in a schlenk flask. The solution was heated at reflux for 18 h, filter over a pad of celite, and chromatographed on a silica gel column eluting with hexane and diethyl ether (v/v, 10:1). Yield: 74%; IR (CO) 2018, 1922 cm**-**1; 1H NMR (300 MHz, d6-benzene, TMS)  4.98 (s, 1 H), 4.74 (s, 1 H), 4.73 (s, 1 H), 3.93 (br s, 2 H), 3.85 (dd, 3.9, 12.0 Hz, 1 H), 3.67 (m, 1 H), 3.46-3.12 (m, 3 H), 3.31 (s. 3 H), 1.65 (m, 1 H), 0.99 (d, 13.0 Hz, 1 H) ppm; elemental analysis (%): calcd: C 50.31, H 4.52; found: C 50.37, H 4.52; = 5.0 (c 0.32, CH2Cl2).

**Synthesis of 7**: A procedure essentially identical to that described above for **4** was followed, replacing **6** (0.20 g, 0.60 mmol) the **2a**. Yield: 81%; IR (CO) 2024, 1942 cm**-**1; 1H NMR (300 MHz, d6-benzene, TMS)  7.50-7.36 (m, 10 H), 5.40 (d, 1.9 Hz, 1 H), 5.26 (s, 1 H), 4.56 (s, 1 H), 4.41 (s, 1 H), 4.18 (dd, 4.7, 11.0 Hz, 1 H), 3.76 (m, 2 H), 3.10 (s, 3 H), 2.98 (m, 2 H), 1.76 (m, 1 H), 1.39 (d, 13.0 Hz, 1 H) ppm; elemental analysis (%): calcd: C 60.24, H 4.67; found: C 60.48, H 4.69; = -140 (c 0.11 in CH2Cl2).

**Synthesis of 8**: Water (1 mL), H2SO4 (1 mL), and THF (5mL) were put in the 50 mL schlenk flask. The solution was bubbled with N2 for 5 min. A solution of **7** (0.20 g, 0.39 mmol) in 5 mL of THF was added to the solution under nitrogen atmosphere. The resulting solution was stirred at 30 C for 2 h. After extraction with excess diethyl ether and sat. NH4Cl solution, the ether layer was dried over anhydrous MgSO4, concentrated, and chromatographed on a silica gel column eluting with hexane and diethyl ether (v/v, 20:1). Yield: 93%; IR (CO) 2022, 1938 cm**-**1; 1H NMR (300 MHz, d6-benzene, TMS)  9.80 (s, 1 H), 7.38 (m, 10 H), 5.70 (br s, 1 H), 4.80 (br s, 1 H), 4.39 (br s, 1 H) ppm; elemental analysis (%): calcd: C 60.60, H 3.39; found: C 60.50, H 3.43; = -251 (c 0.11 in CH2Cl2).

**Synthesis of 9**: A schlenk flask containing molecular sieves 4 Å (0.30 g) was flame-dried. To the flask were added **8** (0.10 g, 0.24 mmol), 7 mL of CH2Cl2, and *t*-butylamine (0.25 mL, 2.4 mmol). The resulting solution was heated at reflux for 5 h, filtered off, evaporated to dryness by rotary evaporator, and dried in vacuo. Yield: 96%; IR (CO) 2018, 1936 cm**-**1; 1H NMR (300 MHz, d6-benzene, TMS)  8.03 (br s, 1 H), 7.62 (t, 7.5 Hz, 2 H), 7.36 (t, 7.6 Hz, 2 H), 7.16-7.09 (m, 6 H), 5.12 (br s, 1 H), 4.10 (br s, 1 H), 3.87 (br s, 1 H), 1.07 (s, 9 H) ppm; 13C NMR (75 MHz, d6- benzene)  = 224.5, 147.7, 138.8, 136.4, 135.2, 132.7, 129.6, 128.8, 128.5, 104.0, 95.7, 90.5, 86.2, 80.3, 57.8, 29.2 ppm; HRMS: calcd for C25H23MnNO3P: 471.0796, obs. 471.0790; = -137 (c 0.13 in CH2Cl2).

Pd-catalyzed allylic alkylation: A solution of [(3-C3H5)PdCl]2 (2.0 mg, 5.5 mol) and **9** (7.7 mg, 16 mol) in 3 mL of CH2Cl2 was stirred at 15 C for 30 min. To the solution were added *rac-*1,3-diphenyl prop-2-en-1-yl acetate (0.27 g, 1.1 mmol), dimethyl malonate (0.19 mL, 1.65 mmol) in 2 mL of CH2Cl2 and 2 mL of CH2Cl2. *N*,*O*-Bis(trimethylsilyl)acetamide (0.79 mL, 3.2 mmol) and KOAc (1 mg) were added to the solution. After the solution was stirred for 4 h, the solution was evaporated to dryness and chromatographed on a silica gel column eluting with hexane and diethyl ether (v/v, 10:1). Yield: 94% (0.33 g, oil).
